# Supplementary material
Source: PubMed Central journal article supplement (PMC6143105)
Supplement: jamainternmed-178-1069-s002.pdf [file jamainternmed-178-1069-s002.pdf]

## Supplementary Online Content

Persell SD, Karmali KN, Lazar D, et al. Effect of electronic health record–based medication support and nurse-led medication therapy management on hypertension and medication self-management: a randomized clinical trial. *JAMA Intern Med*. Published online July 9, 2018. doi:10.1001/jamainternmed.2018.2372

**eMethods 1.** Diabetes Subgroup Analysis

**eMethods 2.** Additional Details Regarding Medication Measures

**eMethods 3.** Health Literacy Analyses

**eMethods 4.** Exploratory Analysis

**eTable 1.** Medication Management Outcomes at 3, 6, and 12 Months by Study Group

**eTable 2.** Additional Outcomes at 12 Months by Study Group

**eTable 3.** Baseline Characteristics Diabetes Subgroup

**eTable 4.** Laboratory and Medication Outcomes in the Diabetes Subgroup at 3, 6, and 12 Months by Study Group

**eTable 5.** Systolic Blood Pressure Differences by Study Group Stratified by Health Literacy

**eTable 6.** Exploratory Analysis Examining Changes in the Number of Hypertension Medications by Study Group

**eTable 7.** Model Adjusted Mean Difference in Systolic Blood Pressure at 12 Months by Study Group in Models With and Without Changes between Baseline and 12 Months in the Number of Antihypertensive Medications Used

**eFigure 1.** Sample Medication List Review Sheet

**eFigure 2.** Sample Medication Information Sheet

This supplementary material has been provided by the authors to give readers additional information about their work.

## eMethods 1. Diabetes Subgroup Analysis

We assessed additional metrics for participants who indicated that they had diabetes mellitus. We calculated several measures of disease control from the data in the health centers' electronic health record based of contemporary performance measures at the time of participant enrollment: 1) most recent hemoglobin A1c was measured in the past 1 year and the value was less than or equal to 9% ( $\text{HbA1c} \leq 9\%$ ), 2) most recent hemoglobin A1c was measured in the past 1 year and the value was less than to 8% ( $\text{HbA1c} < 8\%$ ), and 3) most recent low-density lipoprotein cholesterol was measured in the past 1 year and the value was below 100 mg/dL ( $\text{LDL-C} < 100 \text{ mg/dL}$ ). Each of these measures was assessed at the date of enrollment, and at three, six and twelve months following enrollment. In addition, we assessed medication reconciliation, knowledge of medication indications, understanding of medication instructions and dosing, and self-reported medication adherence for diabetes medications. The characteristics of the subgroup of participants with diabetes is shown in eTable 3. Outcomes for the subgroup with diabetes is shown in Supplemental eTable 4.

## eMethods 2. Additional Details Regarding Medication Measures

*Medication Reconciliation:* When an EHR-listed medication was added or discontinued within 3 days of the interview date, we considered it reconciled if present or absent from the participant's list. Participants could consult pill bottles, or written lists used to track medications if available. We compared two physician raters' classifications for the medication reconciliation measures for comparisons of 200 classifications and found excellent agreement. For the hypertension medication reconciliation measure Kappa statistic = 0.95 (95% CI 0.91 to 0.99). For all chronic medications, Kappa = 0.88 (0.80 to 0.96). For diabetes medications, Kappa = 0.92 (0.86 to 0.98). For lipid medications, Kappa = 0.89 (0.82 to 0.97). For all medications, Kappa = 0.79 (0.66 to 0.92).

*Knowledge of medication indications:* This measure was assessed using the same approach as the one taken by Persell et al. Participants' explanations were rated using a 5-point scale: (1) definitely correct to, (5) definitely incorrect. Responses were judged as incorrect when a respondent said they did not know why they took the medication or if the reviewer judged the response to be probably or definitely incorrect.<sup>11</sup> We tested two physician rater's classifications for 6000 medications and found excellent agreement, Kappa = 0.92 (0.91 to 0.94).

*Understanding of medication instructions and dosing:* Dosing intervals used to classify understanding of medication instructions and dosing were as follows. For each medication, participants were asked to indicate the times of day and the number of tablets taken by placing beads onto a tray with spaces for each hour of the day to represent the time of day and number of pills taken each time. They could indicate to study staff verbally when they did not take their medication the same way each day or used less than an entire pill (e.g., for once weekly medication or for medication with varying dosage). Understanding of medication instructions and dosing for a medication was considered correct if compared to the prescription sig, the participant demonstrated 1) the same number of administrations per day, 2) the same number of tablets taken per administration, and 3) dosing intervals that fell within specified lenient intervals. These intervals were as follows: for twice daily medications administrations separated by at least 8 and no more than 16 hours, for three times a day administrations separated by at least 4 and no more than 13 hours, and for four times a day administrations separated by at least 3 and no more than 8 hours. For example, a participant would be considered to have correct understanding of dosing for a three times a day medicine if she demonstrated taking it at 6 am, 11 am and 10 pm but would be considered incorrect if taken at 6 am 6 pm and 9 pm.

*Medication adherence:* Questions were used from the from the Patient Medication Adherence Questionnaire (PMAQ).<sup>12,13</sup> Participants were asked for each chronic (not only-as-needed) medication whether they missed any pills yesterday, any the day before, and any 3 days ago. If administered on Thursday through Saturday, they were also asked specifically about non-adherence on the prior weekend, "Some people have more trouble taking their pills on the weekend days. Did you miss any of this medicine last Saturday or Sunday?" If administered on Wednesday, they were specifically asked about last Saturday.<sup>12,13</sup> Classification of full adherence vs. not was made for each

medication class, meaning that if a participant indicated any missed doses for any of their antihypertensive medications that person would be classified as not meeting the hypertension medication adherence measure.

### **eMethods 3. Health Literacy Analyses**

Intervention effects stratified by health literacy subgroup are shown in eTable 5. Terms testing for interactions between health literacy category and intervention arm were not significant.

### **eMethods 4. Exploratory Analysis**

After observing study findings, we hypothesized that EHR-tools alone may have led to the identification of duplicate medications and/or medication self-discontinuation thereby leading participants in that group to use fewer total antihypertension medications. We analyzed the distribution of the number of participant-reported antihypertension medications used at baseline and 12 months, and examined whether changes in the number of antihypertension medications used accounted for observed changes in systolic blood pressure at 12 months.

The distribution of the number of antihypertensive medications taken was similar across study groups at baseline and at 12 months. The median change in the number of blood pressure medications over the 12-month study period was 0 in all three groups. Changes in the number of antihypertensive medications did not explain intervention group differences in systolic blood pressure at 12 months (eTables 6 and 7).

**eTable 1. Medication Management Outcomes at 3, 6, and 12 Months by Study Group**

|                                             | Usual care |      | EHR tools alone |      | EHR tools alone vs usual care |         | EHR tools plus education |      | EHR tools plus education vs usual care |         | EHR tools plus education vs EHR tools alone |         |
|---------------------------------------------|------------|------|-----------------|------|-------------------------------|---------|--------------------------|------|----------------------------------------|---------|---------------------------------------------|---------|
|                                             | N          | %    | N               | %    | Adjusted odd ratio (CI)       | P Value | N                        | %    | Adjusted odd ratio (CI)                | P Value | Adjusted odd ratio (CI)                     | P Value |
| Hypertension, baseline                      | 252        | 36.1 | 261             | 44.4 | —                             |         | 278                      | 50.7 | —                                      |         | —                                           |         |
| Hypertension, 3 mo                          | 228        | 43.0 | 245             | 50.6 | 1.3 (0.7, 2.6)                | .45     | 255                      | 62.0 | 1.9 (0.9, 3.9)                         | .072    | 1.5 (0.7, 3.0)                              | .30     |
| Hypertension, 6 mo                          | 230        | 43.0 | 250             | 52.8 | 1.5 (0.8, 2.8)                | .20     | 261                      | 58.2 | 1.5 (0.8, 2.8)                         | .19     | 1.0 (0.5, 1.9)                              | .98     |
| Hypertension, 12 mo                         | 252        | 36.1 | 261             | 51.0 | 1.8 (1.1, 2.9)                | .014    | 278                      | 55.4 | 2.0 (1.3, 3.3)                         | .0032   | 1.1 (0.7, 1.8)                              | .62     |
| All chronic condition medications, baseline | 252        | 10.7 | 261             | 26.4 | —                             |         | 278                      | 26.6 | —                                      |         | —                                           |         |
| All chronic condition medications, 3 mo     | 228        | 16.2 | 245             | 29.4 | 1.6 (0.7, 3.4)                | .26     | 255                      | 34.5 | 2.1 (1.0, 4.5)                         | .064    | 1.3 (0.6, 2.8)                              | .45     |
| All chronic condition medications, 6 mo     | 230        | 13.5 | 250             | 31.6 | 2.9 (1.2, 7.4)                | .025    | 261                      | 31.0 | 2.2 (0.9, 5.7)                         | .10     | 0.8 (0.3, 1.9)                              | .54     |
| All chronic condition medications, 12 mo    | 252        | 11.9 | 261             | 27.6 | 2.5 (1.2, 5.2)                | .017    | 278                      | 25.5 | 2.5 (1.2, 5.2)                         | .016    | 1.0 (0.5, 2.0)                              | .98     |
| All medications, baseline                   | 252        | 1.6  | 261             | 11.1 | —                             |         | 278                      | 11.2 | —                                      |         | —                                           |         |
| All medications, 3 mo                       | 228        | 3.5  | 245             | 9.8  | 2.1 (0.9, 5.0)                | .082    | 255                      | 12.2 | 2.8 (1.2, 6.4)                         | .014    | 1.3 (0.7, 2.4)                              | .35     |
| All medications, 6 mo                       | 230        | 3.9  | 250             | 8.8  | 2.1 (0.8, 5.7)                | .14     | 261                      | 8.1  | 1.8 (0.6, 4.8)                         | .27     | 0.8 (0.4, 2.0)                              | .68     |
| All medications, 12 mo                      | 252        | 1.6  | 261             | 6.9  | 4.0 (0.7, 22.2)               | .11     | 278                      | 7.6  | 6.0 (1.1, 32.3)                        | .037    | 1.5 (0.4, 6.1)                              | .58     |
| <b>Knowledge of medication indication</b>   |            |      |                 |      |                               |         |                          |      |                                        |         |                                             |         |
| Hypertension, baseline                      | 229        | 77.7 | 238             | 78.2 | —                             |         | 235                      | 84.3 | —                                      |         | —                                           |         |
| Hypertension, 3 mo                          | 216        | 78.7 | 239             | 84.1 | 2.1 (1.0, 4.6)                | .051    | 237                      | 86.9 | 1.9 (0.9, 4.3)                         | .10     | 0.9 (0.4, 2.0)                              | .81     |
| Hypertension, 6 mo                          | 221        | 79.6 | 246             | 82.9 | 1.8 (0.8, 3.8)                | .14     | 245                      | 87.4 | 1.5 (0.7, 3.3)                         | .33     | 0.8 (0.4, 1.9)                              | .67     |
| Hypertension, 12 mo                         | 240        | 80.8 | 255             | 83.1 | 1.3 (0.8, 2.4)                | .32     | 267                      | 87.3 | 1.4 (0.8, 2.5)                         | .30     | 1.0 (0.6, 1.9)                              | .95     |
| All chronic condition medications, baseline | 247        | 69.2 | 253             | 65.6 | —                             |         | 265                      | 76.2 | —                                      |         | —                                           |         |
| All chronic condition medications, 3 mo     | 228        | 68.9 | 245             | 71.8 | 1.6 (0.9, 2.9)                | .13     | 247                      | 78.5 | 1.7 (0.9, 3.1)                         | .099    | 1.1 (0.6, 1.9)                              | .86     |
| All chronic condition medications, 6 mo     | 229        | 69.0 | 251             | 67.3 | 1.0 (0.6, 1.8)                | .88     | 259                      | 77.2 | 1.3 (0.7, 2.2)                         | .37     | 1.2 (0.7, 2.1)                              | .44     |
| All chronic condition medications, 12 mo    | 250        | 70.8 | 259             | 67.6 | 1.0 (0.6, 1.5)                | .82     | 277                      | 75.5 | 1.1 (0.7, 1.7)                         | .69     | 1.2 (0.7, 1.8)                              | .53     |

|                                                            |                                             |     |      |     |      |                |      |     |      |                |       |                |      |
|------------------------------------------------------------|---------------------------------------------|-----|------|-----|------|----------------|------|-----|------|----------------|-------|----------------|------|
|                                                            | All medications, baseline                   | 254 | 46.1 | 262 | 48.1 | —              |      | 277 | 50.2 | —              |       | —              |      |
|                                                            | All medications, 3 mo                       | 231 | 54.6 | 246 | 58.9 | 1.3 (0.8, 2.1) | .37  | 254 | 63.4 | 1.6 (1.0, 2.5) | .078  | 1.2 (0.8, 2.0) | .38  |
|                                                            | All medications, 6 mo                       | 231 | 54.6 | 252 | 56.4 | 1.1 (0.6, 1.8) | 0.86 | 260 | 65.0 | 1.6 (0.9, 2.8) | 0.10  | 1.5 (0.9, 2.7) | 0.15 |
|                                                            | All medications, 12 mo                      | 253 | 54.2 | 261 | 57.1 | 1.1 (0.6, 2.0) | 0.71 | 277 | 63.5 | 1.3 (0.7, 2.4) | 0.34  | 1.2 (0.6, 2.2) | 0.57 |
| <b>Understanding of medication instructions and dosing</b> |                                             |     |      |     |      |                |      |     |      |                |       |                |      |
|                                                            | Hypertension, baseline                      | 226 | 81.0 | 235 | 84.7 | —              |      | 234 | 80.3 | —              |       | —              |      |
|                                                            | Hypertension, 3 mo                          | 214 | 77.6 | 237 | 78.5 | 1.1 (0.4, 2.7) | .90  | 235 | 88.5 | 2.5 (0.9, 6.6) | .070  | 2.3 (0.9, 6.2) | .092 |
|                                                            | Hypertension, 6 mo                          | 221 | 76.9 | 244 | 76.6 | 1.2 (0.5, 3.0) | .73  | 243 | 83.1 | 1.8 (0.7, 4.9) | .23   | 1.5 (0.6, 4.1) | .38  |
|                                                            | Hypertension, 12 mo                         | 238 | 74.4 | 255 | 78.4 | 1.3 (0.6, 2.5) | .53  | 264 | 85.2 | 2.3 (1.1, 4.8) | .026  | 1.8 (0.9, 3.9) | .11  |
|                                                            | All chronic condition medications, baseline | 244 | 73.0 | 249 | 75.5 | —              |      | 260 | 71.9 | —              |       | —              |      |
|                                                            | All chronic condition medications, 3 mo     | 224 | 66.1 | 241 | 69.3 | 1.2 (0.7, 2.0) | .45  | 244 | 76.6 | 2.0 (1.2, 3.5) | .0092 | 1.7 (1.0, 2.9) | .060 |
|                                                            | All chronic condition medications, 6 mo     | 229 | 65.1 | 248 | 66.9 | 1.1 (0.5, 2.2) | .80  | 256 | 70.7 | 1.5 (0.7, 3.2) | .25   | 1.4 (0.7, 2.9) | .36  |
|                                                            | All chronic condition medications, 12 mo    | 248 | 63.7 | 261 | 69.0 | 1.2 (0.7, 2.0) | .47  | 275 | 73.1 | 1.7 (1.0, 2.8) | .051  | 1.4 (0.8, 2.3) | .22  |
|                                                            | All medications, baseline                   | 252 | 61.1 | 259 | 69.9 | —              |      | 275 | 64.7 | —              |       | —              |      |
|                                                            | All medications, 3 mo                       | 227 | 56.0 | 243 | 63.0 | 1.3 (0.7, 2.2) | .44  | 248 | 65.3 | 1.6 (0.9, 2.8) | .13   | 1.2 (0.7, 2.2) | .47  |
|                                                            | All medications, 6 mo                       | 231 | 57.1 | 248 | 59.7 | 1.1 (0.4, 2.9) | .85  | 256 | 62.9 | 1.6 (0.6, 4.3) | .35   | 1.5 (0.5, 3.9) | .45  |
|                                                            | All medications, 12 mo                      | 253 | 56.5 | 261 | 62.8 | 1.2 (0.7, 2.0) | .54  | 276 | 67.4 | 1.7 (1.0, 2.9) | .047  | 1.5 (0.9, 2.5) | .17  |
| <b>Medication adherence, 4-day recall</b>                  |                                             |     |      |     |      |                |      |     |      |                |       |                |      |
|                                                            | Hypertension, baseline                      | 229 | 61.1 | 238 | 67.2 | —              |      | 236 | 56.8 | —              |       | —              |      |
|                                                            | Hypertension, 3 mo                          | 215 | 68.4 | 239 | 74.9 | 1.2 (0.7, 2.3) | .53  | 237 | 63.7 | 0.8 (0.4, 1.5) | .52   | 0.7 (0.4, 1.3) | .21  |
|                                                            | Hypertension, 6 mo                          | 221 | 62.2 | 246 | 79.7 | 1.9 (1.1, 3.3) | .031 | 244 | 73.4 | 1.4 (0.8, 2.4) | .25   | 0.7 (0.4, 1.3) | .31  |
|                                                            | Hypertension, 12 mo                         | 239 | 74.5 | 256 | 73.8 | 0.9 (0.6, 1.4) | .64  | 267 | 71.5 | 0.9 (0.6, 1.4) | .59   | 1.0 (0.6, 1.5) | .94  |
|                                                            | All chronic condition medications, baseline | 247 | 53.4 | 252 | 58.7 | —              |      | 264 | 47.0 | —              |       | —              |      |
|                                                            | All chronic condition medications, 3 mo     | 227 | 60.4 | 245 | 66.9 | 1.2 (0.7, 2.0) | .57  | 247 | 52.6 | 0.7 (0.4, 1.3) | .28   | 0.6 (0.4, 1.1) | .10  |
|                                                            | All chronic condition medications, 6 mo     | 229 | 63.3 | 251 | 71.7 | 1.4 (0.7, 2.7) | .29  | 258 | 57.8 | 0.8 (0.4, 1.6) | .56   | 0.6 (0.3, 1.1) | .11  |
|                                                            | All chronic condition medications, 12 mo    | 249 | 63.9 | 261 | 61.3 | 0.8 (0.6, 1.2) | .34  | 277 | 59.2 | 0.8 (0.6, 1.2) | .33   | 1.0 (0.7, 1.4) | .99  |

All models contain baseline values for the outcome, study group and health center-level random effects.

**eTable 2. Additional Outcomes at Baseline and 12 Months by Study Group**

|                                                          | Usual care N = 254 | EHR tools alone N = 262 | EHR tools alone vs usual care       |         | EHR tools plus education N = 278 | EHR tools plus education vs usual care |         | EHR tools plus education vs EHR tools alone |         |
|----------------------------------------------------------|--------------------|-------------------------|-------------------------------------|---------|----------------------------------|----------------------------------------|---------|---------------------------------------------|---------|
|                                                          | %                  | %                       | Adjusted odd ratio (CI)             | P Value | %                                | Adjusted odd ratio (CI)                | P Value | Adjusted odd ratio (CI)                     | P Value |
| <b>PAM Level 4, Baseline<sup>a</sup></b>                 | 53.5               | 61.1                    | —                                   |         | 52.5                             | —                                      |         | —                                           |         |
| <b>PAM Level 4, 12 mo.<sup>a</sup></b>                   | 56.3               | 70.6                    | 1.7 (0.98, 2.8)                     | .059    | 57.2                             | 1.0 (0.6, 1.7)                         | .90     | 0.6 (0.4, 1.1)                              | .079    |
|                                                          | Mean (SD)          | Mean (SD)               | Model adjusted mean difference (CI) | P Value | Mean (SD)                        | Model adjusted mean difference (CI)    | P Value | Model adjusted mean difference (CI)         | P Value |
| <b>Health-Related Quality of Life, SF-12<sup>b</sup></b> |                    |                         |                                     |         |                                  |                                        |         |                                             |         |
| Physical score, Baseline                                 | 40.8 (8.6)         | 41.6 (9.1)              | —                                   |         | 43.8 (8.9)                       | —                                      |         | —                                           |         |
| Physical score, 12 mo.                                   | 41.9 (8.6)         | 43.3 (8.7)              | 0.9 (-0.3, 2.1)                     | .14     | 44.4 (9.1)                       | 0.8 (-0.4, 2.0)                        | .20     | -0.1 (-1.3, 1.1)                            | .84     |
| Mental score, Baseline                                   | 43.7 (11.0)        | 45.9 (12.0)             | —                                   |         | 44.4 (11.7)                      | —                                      |         | —                                           |         |
| Mental score, 12 mo.                                     | 45.2 (10.6)        | 47.9 (11.1)             | 1.7 (-0.6, 4.1)                     | .15     | 46.3 (11.2)                      | 0.8 (-1.5, 3.2)                        | .50     | -0.9 (-3.3, 1.4)                            | .44     |

All models contain baseline values for the outcome, study group and health center-level random effects.

CI: 95 % confidence interval. SD: standard deviation

<sup>a</sup> Patient Activation Measure. Level 4 indicates a score of 67.1-100 and indicates a patient is proactive about health.<sup>15, 16</sup>

<sup>b</sup> Using a modified version of the SF12v2.<sup>14</sup>



**eTable 3. Baseline Characteristics Diabetes Subgroup**

| Characteristic                        | Total<br>(n = 348) | Study Group             |                                 |                                          |
|---------------------------------------|--------------------|-------------------------|---------------------------------|------------------------------------------|
|                                       |                    | Usual care<br>(n = 130) | EHR tools<br>alone (n =<br>111) | EHR tools plus<br>education (n =<br>107) |
| Age, mean (SD)                        | 53.6 (9.5)         | 54.4 (9.1)              | 53.7 (10.0)                     | 52.3 (9.6)                               |
| Female sex, %                         | 68.4               | 68.5                    | 67.6                            | 69.3                                     |
| Race/Ethnicity, %                     |                    |                         |                                 |                                          |
| Black, African American               | 87.1               | 90.0                    | 89.2                            | 81.1                                     |
| White, non-Hispanic                   | 3.5                | 2.3                     | 4.5                             | 3.7                                      |
| Hispanic                              | 4.9                | 4.6                     | 1.8                             | 8.4                                      |
| Other or did not disclose             | 4.6                | 3.1                     | 4.5                             | 3.7                                      |
| Education, %                          |                    |                         |                                 |                                          |
| Less than Grade 12                    | 32.2               | 36.2                    | 33.3                            | 26.2                                     |
| High school graduate or equivalent    | 34.2               | 35.4                    | 33.3                            | 33.6                                     |
| Some college                          | 28.5               | 26.2                    | 27.9                            | 31.8                                     |
| College graduate or greater           | 4.9                | 2.3                     | 5.4                             | 7.5                                      |
| Income, %                             |                    |                         |                                 |                                          |
| < \$10,000                            | 48.3               | 53.1                    | 43.2                            | 47.7                                     |
| \$10,000 to <\$20,000                 | 29.3               | 27.7                    | 29.7                            | 30.8                                     |
| \$20,000 or more                      | 17.2               | 15.4                    | 18.0                            | 18.7                                     |
| Did not disclose                      | 5.2                | 3.9                     | 9.0                             | 2.8                                      |
| Health Insurance, %                   |                    |                         |                                 |                                          |
| Medicaid                              | 52.0               | 52.3                    | 39.6                            | 64.5                                     |
| Medicare                              | 22.1               | 25.4                    | 21.6                            | 18.7                                     |
| Commercial insurance                  | 11.2               | 15.4                    | 10.8                            | 6.5                                      |
| Self-pay, other or did not disclose   | 17.0               | 13.9                    | 26.1                            | 11.2                                     |
| Marital status: married or partner, % | 23.9               | 30.0                    | 15.3                            | 25.2                                     |
| English speaker, %                    | 97.1               | 98.5                    | 96.4                            | 96.3                                     |
| # of total medications, median (IQR)  | 6 (4,7)            | 5 (4,7)                 | 6 (4.8)                         | 6 (4,7)                                  |
| Blood pressure, mean, mm Hg (SD)      |                    |                         |                                 |                                          |
| Systolic                              | 142.3 (17.6)       | 138.9 (16.7)            | 146.7(18.6)                     | 141.8 (17.0)                             |
| Diastolic                             | 85.0 (11.5)        | 84.0 (11.8)             | 86.0 (11.8)                     | 85.3 (10.8)                              |
| HbA1c ≤ 9 %, %                        | 53.4               | 49.2                    | 56.8                            | 55.1                                     |



|                     |      |      |      |      |
|---------------------|------|------|------|------|
| HbA1c < 8 %, %      | 45.4 | 41.5 | 49.6 | 45.8 |
| LDL-C <100 mg/dl, % | 29.6 | 23.9 | 43.2 | 22.4 |
| Health literacy, %  |      |      |      |      |
| Likely limited      | 48.0 | 58.5 | 46.0 | 37.4 |
| Possibly limited    | 33.1 | 28.5 | 31.5 | 40.2 |
| Adequate            | 19.0 | 13.1 | 22.5 | 22.4 |

eTable 4. Laboratory and Medication Outcomes in the Diabetes Subgroup at Baseline, 3, 6, and 12 Months by Study Group

|                                                            | Usual care |      | EHR tools alone |      | EHR tools alone vs usual care |         | EHR plus education |      | EHR plus education vs usual care |         | EHR plus education vs EHR tools alone |         |
|------------------------------------------------------------|------------|------|-----------------|------|-------------------------------|---------|--------------------|------|----------------------------------|---------|---------------------------------------|---------|
|                                                            | N          | %    | N               | %    | Adjusted odd ratio (CI)       | P Value | N                  | %    | Adjusted odd ratio (CI)          | P Value | Adjusted odd ratio (CI)               | P Value |
| <b>HbA1c ≤ 9 %, baseline</b>                               | 130        | 49.2 | 111             | 56.8 | —                             |         | 107                | 55.1 | —                                |         | —                                     |         |
| <b>HbA1c ≤ 9 %, mo 3</b>                                   | 130        | 53.1 | 111             | 55.0 | 0.8 (0.3, 2.0)                | .67     | 107                | 61.7 | 1.5 (0.6, 3.8)                   | .33     | 1.9 (0.7, 4.7)                        | .18     |
| <b>HbA1c ≤ 9 %, mo 6</b>                                   | 130        | 53.1 | 111             | 54.1 | 0.8 (0.4, 1.5)                | .52     | 107                | 64.5 | 1.6 (0.9, 3.1)                   | .13     | 2.0 (1.0, 4.0)                        | .031    |
| <b>HbA1c ≤ 9 %, mo 12</b>                                  | 130        | 54.6 | 111             | 53.2 | 0.8 (0.4, 1.6)                | .53     | 107                | 68.2 | 1.9 (0.9, 3.8)                   | .079    | 2.3 (1.1, 4.8)                        | .023    |
| <b>HbA1c &lt; 8 %, baseline</b>                            |            | 41.5 |                 | 49.6 | —                             |         |                    | 45.8 | —                                |         | —                                     |         |
| <b>HbA1c &lt; 8 %, mo 3</b>                                | 130        | 45.4 | 111             | 47.8 | 0.8 (0.3, 1.9)                | .65     | 107                | 52.3 | 1.4 (0.6, 3.4)                   | .43     | 1.7 (0.7, 4.3)                        | .23     |
| <b>HbA1c &lt; 8 %, mo 6</b>                                | 130        | 45.4 | 111             | 44.1 | 0.7 (0.4, 1.3)                | .25     | 107                | 54.2 | 1.5 (0.8, 2.8)                   | .23     | 2.1 (1.1, 4.2)                        | .027    |
| <b>HbA1c &lt; 8 %, mo 12</b>                               | 130        | 46.9 | 111             | 43.2 | 0.8 (0.4, 1.6)                | .45     | 107                | 59.8 | 1.8 (0.8, 3.9)                   | .13     | 2.4 (1.1, 5.3)                        | .030    |
| <b>LDL-C &lt;100 mg/dL, baseline</b>                       |            | 23.9 |                 | 43.2 | —                             |         |                    | 22.4 | —                                |         | —                                     |         |
| <b>LDL-C &lt;100 mg/dL, mo 3</b>                           | 130        | 24.6 | 111             | 46.0 | 2.0 (0.9, 4.3)                | .096    | 107                | 30.8 | 2.0 (0.9, 4.5)                   | .088    | 1.0 (0.5, 2.3)                        | .94     |
| <b>LDL-C &lt;100 mg/dL, mo 6</b>                           | 130        | 28.5 | 111             | 40.5 | 1.1 (0.5, 2.4)                | .85     | 107                | 31.8 | 1.3 (0.6, 3.0)                   | .51     | 1.2 (0.5, 2.8)                        | .85     |
| <b>LDL-C &lt;100 mg/dL, mo 12</b>                          | 130        | 32.3 | 111             | 31.5 | 0.8 (0.4, 1.4)                | .37     | 107                | 33.6 | 1.1 (0.6, 1.9)                   | .79     | 1.4 (0.8, 2.7)                        | .27     |
| <b>Understanding of medication instructions and dosing</b> |            |      |                 |      |                               |         |                    |      |                                  |         |                                       |         |
| Diabetes medications, baseline                             | 78         | 75.6 | 81              | 74.1 | —                             |         | 70                 | 72.9 | —                                |         | —                                     |         |
| Diabetes medications, 3 months                             | 69         | 68.1 | 76              | 76.3 | 1.6 (0.7, 3.5)                | .29     | 76                 | 80.3 | 2.1 (0.9, 5.2)                   | .094    | 1.4 (0.6, 3.3)                        | .48     |
| Diabetes medications, 6 months                             | 72         | 63.9 | 77              | 72.7 | 2.0 (0.9, 4.4)                | .10     | 77                 | 68.8 | 1.9 (0.8, 4.4)                   | .13     | 1.0 (0.4, 2.2)                        | .95     |
| Diabetes medications, 12 months                            | 77         | 72.7 | 81              | 82.7 | 2.1 (0.9, 5.0)                | .11     | 72                 | 70.8 | 1.1 (0.5, 2.6)                   | .79     | 0.5 (0.2, 1.3)                        | .18     |
| <b>Self-reported medication adherence</b>                  |            |      |                 |      |                               |         |                    |      |                                  |         |                                       |         |
| Diabetes medications, baseline                             | 89         | 65.2 | 94              | 73.4 | —                             |         | 81                 | 66.7 | —                                |         | —                                     |         |
| Diabetes medications, 3 months                             | 81         | 71.6 | 91              | 78.0 | 1.2 (0.6, 2.6)                | .62     | 81                 | 65.4 | 0.7 (0.3, 1.4)                   | .27     | 0.5 (0.3, 1.1)                        | .11     |

|                                           |                                 |     |      |     |      |                |       |     |      |                |        |                 |      |
|-------------------------------------------|---------------------------------|-----|------|-----|------|----------------|-------|-----|------|----------------|--------|-----------------|------|
|                                           | Diabetes medications, 6 months  | 85  | 84.7 | 91  | 85.7 | 0.9 (.3, 3.1)  | 0.93  | 85  | 67.1 | 0.4 (0.1, 1.3) | 0.12   | 0.3 (0.1, 1.3)  | 0.14 |
|                                           | Diabetes medications, 12 months | 90  | 75.6 | 97  | 79.4 | 0.8 (0.4, 1.7) | 0.53  | 83  | 73.5 | 0.6 (0.3, 1.3) | 0.21   | 0.8 (0.4, 1.6)  | 0.51 |
| <b>Medications reconciled</b>             |                                 |     |      |     |      |                |       |     |      |                |        |                 |      |
|                                           | Diabetes medications, baseline  | 130 | 60.8 | 111 | 65.8 | —              |       | 107 | 57.9 | —              |        | —               |      |
|                                           | Diabetes medications, 3 months  | 117 | 62.4 | 105 | 66.7 | 1.3 (0.4, 3.8) | 0.42  | 101 | 75.3 | 2.1 (0.8, 8.0) | 0.11   | 2.0 (0.6, 6.4)  | 0.25 |
|                                           | Diabetes medications, 6 months  | 120 | 67.3 | 104 | 67.3 | 1.5 (0.7, 3.5) | 0.29  | 102 | 68.6 | 1.7 (0.7, 3.8) | 0.23   | 1.1 (0.5, 2.6)  | 0.86 |
|                                           | Diabetes medications, 12 months | 130 | 50.0 | 111 | 64.0 | 1.8 (1.0, 3.2) | 0.057 | 107 | 69.2 | 2.6 (1.4, 4.8) | 0.0020 | 1.5 (0.8, 2.8)  | 0.22 |
| <b>Knowledge of medication indication</b> |                                 |     |      |     |      |                |       |     |      |                |        |                 |      |
|                                           | Diabetes medications, baseline  | 89  | 92.1 | 94  | 94.7 | —              |       | 82  | 89.0 | —              |        | —               |      |
|                                           | Diabetes medications, 3 months  | 81  | 92.6 | 91  | 95.6 | 2.3 (0.1, 103) | 0.67  | 80  | 86.3 | 0.7 (0.02, 30) | 0.86   | 0.3 (0.009, 11) | 0.52 |
|                                           | Diabetes medications, 6 months  | 85  | 92.9 | 91  | 94.5 | 0.5 (0.02, 12) | 0.68  | 85  | 89.4 | 0.6 (0.03, 12) | 0.75   | 1.2 (0.1, 24)   | 0.90 |
|                                           | Diabetes medications, 12 months | 93  | 92.5 | 99  | 92.9 | 1.2 (0.2, 7.0) | 0.81  | 85  | 90.6 | 1.1 (0.2, 5.5) | 0.95   | 0.9 (0.2, 4.7)  | 0.86 |

All models contain baseline values for the outcome, study group and health center-level random effects.

eTable 5. Systolic Blood Pressure Differences by Study Group Stratified by Health Literacy

| Systolic blood pressure, mm Hg          | Usual care     | EHR tools alone | EHR tools alone vs usual care              |         | EHR tools plus education | EHR tools plus education vs usual care |         | EHR tools plus education vs EHR tools alone |         |
|-----------------------------------------|----------------|-----------------|--------------------------------------------|---------|--------------------------|----------------------------------------|---------|---------------------------------------------|---------|
|                                         | Mean (SD)      | Mean (SD)       | Model adjusted mean difference, mm Hg (CI) | P Value | Mean (SD)                | Model adjusted mean difference (CI)    | P Value | Model adjusted mean difference, mm Hg (CI)  | P Value |
| <b>Likely Limited Health Literacy</b>   | <b>N = 145</b> | <b>N = 126</b>  |                                            |         | <b>N = 104</b>           |                                        |         |                                             |         |
| Baseline                                | 142.3 (15.3)   | 147.0 (16.1)    | —                                          |         | 145.5 (18.1)             | —                                      |         | —                                           |         |
| 3 mo.                                   | 132.5 (20.1)   | 140.2 (20.0)    | 5.0 (0.8, 9.2)                             | .020    | 134.1 (19.4)             | -0.3 (-4.7, 4.2)                       | .91     | -5.2 (-9.8, -0.7)                           | .024    |
| 6 mo.                                   | 133.7 (21.4)   | 140.5 (20.6)    | 4.6 (0.0, 9.2)                             | .048    | 134.8 (18.8)             | -0.4 (-5.2, 4.4)                       | .87     | -5.0 (-10.0, -0.1)                          | .047    |
| 12 mo.*                                 | 135.5 (20.7)   | 141.7 (20.0)    | 4.3 (-0.8, 9.4)                            | .10     | 133.8 (18.8)             | -3.3 (-8.7, 2.0)                       | .22     | -7.6 (-13.2, -2.1)                          | .0069   |
| <b>Possibly Limited Health Literacy</b> | <b>N = 75</b>  | <b>N = 90</b>   |                                            |         | <b>N = 98</b>            |                                        |         |                                             |         |
| Baseline                                | 150.4 (18.2)   | 150.4 (18.2)    | —                                          |         | 145.6 (17.5)             | —                                      |         | —                                           |         |
| 3 mo.                                   | 141.2 (19.0)   | 141.2 (19.0)    | 0.3 (-4.8, 5.4)                            | .91     | 135.9 (18.1)             | -2.1 (-7.0, 2.9)                       | .41     | -2.3 (-7.0, 2.3)                            | .32     |
| 6 mo.                                   | 137.7 (21.4)   | 137.7 (21.4)    | -2.2 (-8.3, 3.8)                           | .47     | 133.6 (20.8)             | -4.0 (-9.9, 1.9)                       | .18     | -1.7 (-7.3, 3.9)                            | .54     |
| 12 mo.*                                 | 138.4 (22.4)   | 138.4 (22.4)    | 0.5 (-5.3, 6.3)                            | .86     | 132.2 (19.4)             | -3.2 (-8.8, 2.4)                       | .26     | -3.7 (-9.0, 1.6)                            | .17     |
| <b>Likely Adequate Health Literacy</b>  | <b>N = 34</b>  | <b>N = 46</b>   |                                            |         | <b>N = 76</b>            |                                        |         |                                             |         |
| Baseline                                | 141.8 (14.8)   | 149.4 (19.6)    | —                                          |         | 145.5 (16.7)             | —                                      |         | —                                           |         |
| 3 mo.                                   | 135.3 (20.4)   | 144.1 (19.6)    | 2.8 (-5.5, 11.0)                           | .51     | 135.6 (22.8)             | -2.7 (-10.2, 4.8)                      | .48     | -5.4 (-12.2, 1.3)                           | .11     |
| 6 mo.                                   | 135.0 (19.8)   | 142.8 (21.8)    | 2.7 (-5.7, 11.1)                           | .52     | 136.3 (22.6)             | -1.2 (-8.8, 6.4)                       | .75     | -4.0 (-10.9, 2.9)                           | .26     |
| 12 mo.*                                 | 135.5 (20.1)   | 148.1 (25.7)    | 8.0 (-1.1, 17.0)                           | .084    | 138.9 (21.5)             | 1.1 (-7.1, 9.3)                        | .79     | -6.9 (-14.3, 0.5)                           | .069    |

All models contain baseline values for the outcome, study group and health center-level random effects.

\* Primary study outcome

**eTable 6. Exploratory Analysis Examining Changes in the Number of Hypertension Medications by Study Group**

| Characteristic                                                                                                                  | Total   | Study Group |                 |                          |
|---------------------------------------------------------------------------------------------------------------------------------|---------|-------------|-----------------|--------------------------|
|                                                                                                                                 |         | Usual care  | EHR tools alone | EHR tools with education |
| Number of different antihypertensive medications used at baseline, median (IQR)                                                 | 2 (1,2) | 2 (1,2)     | 2 (1,2)         | 2 (1,2)                  |
| Number of different antihypertensive medications used at 12 months, median (IQR)                                                | 2 (1,3) | 2 (1,3)     | 2 (1,3)         | 2 (1,2)                  |
| Change between baseline and 12 months in the number of antihypertensive medications used, median (IQR)                          | 0 (0,1) | 0 (0, 1)    | 0 (0, 1)        | 0 (0, 1)                 |
| Proportion of participants with a decrease between baseline and 12 months in the number of antihypertensive medications used, % | 9.8     | 10.6        | 8.4             | 10.4                     |

**eTable 7. Model Adjusted Mean Difference in Systolic Blood Pressure at 12 Months by Study Group in Models With and Without Changes Between Baseline and 12 Months in the Number of Antihypertensive Medications Used**

|                                             |                                                                                                                                                                    | EHR tools alone vs usual care       |         | EHR tools plus education vs usual care |         | EHR tools plus education vs EHR tools alone |         |
|---------------------------------------------|--------------------------------------------------------------------------------------------------------------------------------------------------------------------|-------------------------------------|---------|----------------------------------------|---------|---------------------------------------------|---------|
| Systolic blood pressure, mm Hg at 12 months |                                                                                                                                                                    | Model adjusted mean difference (CI) | P Value | Model adjusted mean difference (CI)    | P Value | Model adjusted mean difference (CI)         | P Value |
|                                             | Model 1: baseline SBP, study arm, and health-center level random effects                                                                                           | 3.6 (0.3, 6.9)                      | .034    | -2.0 (-5.2, 1.3)                       | .23     | -5.6 (-8.8, -2.4)                           | .001    |
|                                             | Model 2: baseline SBP, study arm, change between baseline and 12 months in the number of antihypertensive medications used, and health-center level random effects | 3.5 (0.2, 6.9)                      | .037    | -2.1 (-5.3, 1.2)                       | .21     | -5.6 (-8.8, -2.4)                           | .0006   |

## eFigure 1. Sample Medication List Review Sheet

### Please Review Your Medicines

It is very important that your doctor knows all the medicines you are taking.

Follow these steps:

Step 1. Remove any medicines you are not currently taking by drawing a line through the drug's name.

Step 2. For medicines you are currently taking, place a check (☐) in the **Taking as directed?** column next to the correct box indicating if you are taking the medication as directed in the instructions.

Step 3. Place a check (☐) in the **Concerns** column next to any concern you may have about the medication.

#### Your Current Medications Are

| Medication                                | Instructions                                         | Taking as directed?                                                                                 | Concerns                                                                                                                                                                    |
|-------------------------------------------|------------------------------------------------------|-----------------------------------------------------------------------------------------------------|-----------------------------------------------------------------------------------------------------------------------------------------------------------------------------|
| AmLODIPine Besylate 2.5 MG TABS (NORVASC) | Take 1 pill by mouth every morning                   | <input type="checkbox"/> yes <input type="checkbox"/> no<br><input type="checkbox"/> only as needed | <input type="checkbox"/> None <input type="checkbox"/> Need Refill<br><input type="checkbox"/> Cost <input type="checkbox"/> Side Effects<br><input type="checkbox"/> Other |
| lisinopril 10 MG TABS (PRINIVIL; ZESTRIL) | Take 1 pill by mouth every morning                   | <input type="checkbox"/> yes <input type="checkbox"/> no<br><input type="checkbox"/> only as needed | <input type="checkbox"/> None <input type="checkbox"/> Need Refill<br><input type="checkbox"/> Cost <input type="checkbox"/> Side Effects<br><input type="checkbox"/> Other |
| MetFORMIN HCl 500 MG TABS (GLUCOPHAGE)    | Take 1 pill in the morning and 1 pill in the evening | <input type="checkbox"/> yes <input type="checkbox"/> no<br><input type="checkbox"/> only as needed | <input type="checkbox"/> None <input type="checkbox"/> Need Refill<br><input type="checkbox"/> Cost <input type="checkbox"/> Side Effects<br><input type="checkbox"/> Other |
| Atorvastatin Calcium 80 MG TABS (LIPITOR) | Take 1 pill every evening                            | <input type="checkbox"/> yes <input type="checkbox"/> no<br><input type="checkbox"/> only as needed | <input type="checkbox"/> None <input type="checkbox"/> Need Refill<br><input type="checkbox"/> Cost <input type="checkbox"/> Side Effects<br><input type="checkbox"/> Other |

Step 4. Add the names of any other medicines you are currently taking that are not on the list. This includes prescription drugs, over-the-counter medicines, vitamins, and other supplements. For each drug, provide the dose and the instructions on how you take it. *Please don't worry if you have the exact spelling of your medications.*

Step 5. Place a check (☐) in the Concerns column next to any concern you may have about the medication listed.

#### Your Additional Medications Are

| Medication Name | Dose (i.e. 20 mg) | How you take it | Concerns                                                                                                                                   |
|-----------------|-------------------|-----------------|--------------------------------------------------------------------------------------------------------------------------------------------|
|                 |                   |                 | <input type="checkbox"/> Need Refill <input type="checkbox"/> Cost<br><input type="checkbox"/> Side Effects <input type="checkbox"/> Other |
|                 |                   |                 | <input type="checkbox"/> Need Refill <input type="checkbox"/> Cost<br><input type="checkbox"/> Side Effects <input type="checkbox"/> Other |
|                 |                   |                 | <input type="checkbox"/> Need Refill <input type="checkbox"/> Cost<br><input type="checkbox"/> Side Effects <input type="checkbox"/> Other |

eFigure 2. Sample Medication Information Sheet

| <b>SOME IMPORTANT THINGS TO KNOW ABOUT YOUR MEDICATION</b> |                                                                                                                                                                                                                                                                                                                                                                                                                                                                                                                                                   |
|------------------------------------------------------------|---------------------------------------------------------------------------------------------------------------------------------------------------------------------------------------------------------------------------------------------------------------------------------------------------------------------------------------------------------------------------------------------------------------------------------------------------------------------------------------------------------------------------------------------------|
| Generic name                                               | LISINOPRIL + HYDROCHLOROTHIAZIDE [HCTZ]                                                                                                                                                                                                                                                                                                                                                                                                                                                                                                           |
| Brand name                                                 | Prinizide®, Zestoretic®                                                                                                                                                                                                                                                                                                                                                                                                                                                                                                                           |
| Purpose                                                    | This medicine helps lower blood pressure. It takes away extra water and salt in your body. Lisinopril is also called an ACE inhibitor and HCTZ is a diuretic (water pill).                                                                                                                                                                                                                                                                                                                                                                        |
| Benefit                                                    | Treating high blood pressure can help prevent stroke, heart attack, heart failure, and kidney disease. This medicine can also reduce swelling, help protect the kidneys in people who have diabetes, and treat heart failure.                                                                                                                                                                                                                                                                                                                     |
| How to take                                                | <ul style="list-style-type: none"> <li>• Take this medicine by mouth as directed. Try to take it the same time each day.</li> <li>• This medicine can be taken with or without food.</li> <li>• If you miss a dose, take the missed dose as soon as you remember it. However, if it is almost time for the next dose, skip the missed dose and continue your regular dosing schedule. Do not take a double dose to make up for a missed one.</li> </ul>                                                                                           |
| For how long                                               | Refill and keep taking this medicine until your doctor tells you to stop.                                                                                                                                                                                                                                                                                                                                                                                                                                                                         |
| Important!                                                 |  Do NOT use this medication if you are pregnant, may become pregnant, or are breastfeeding.<br><u>Do NOT use this medication if:</u> <ul style="list-style-type: none"> <li>• you are allergic to hydrochlorothiazide (HCTZ) or another thiazide diuretic</li> <li>• you are allergic to lisinopril (Prinizide, Zestoretic), or another ACE inhibitor</li> <li>• you have ever had angioedema (severe swelling of deep skin tissues or other organs)</li> </ul> |
| Stop taking and call us or seek medical care               | <b>Stop taking this medicine and call us right away or seek medical care if you have:</b> <ul style="list-style-type: none"> <li>• hoarseness</li> <li>• swelling of the face, throat, tongue, lips, eyes, hands, feet, ankles, or lower legs</li> <li>• difficulty breathing or swallowing</li> <li>• rash</li> <li>• fainting</li> </ul>                                                                                                                                                                                                        |
| Call us                                                    | <b>Call us if these side effects are severe, last longer than one week, or if you feel concerned:</b> <ul style="list-style-type: none"> <li>• cough</li> <li>• lightheadedness</li> <li>• drowsiness</li> <li>• new symptoms or problems</li> </ul>                                                                                                                                                                                                                                                                                              |
| Remember                                                   | <b>Talk to your doctor about:</b> <ul style="list-style-type: none"> <li>• whether you should avoid salt substitutes or limit foods that are high in potassium</li> <li>• concerns you have about paying for the medicine</li> </ul> <b>Follow up is important</b> <ul style="list-style-type: none"> <li>• remember the date of your next appointment</li> <li>• follow up is important to see how well the medicine is working and to check blood tests when needed</li> </ul>                                                                  |

You will get more detailed information from your pharmacy. You may find the following website useful:  
[www.nlm.nih.gov/medlineplus](http://www.nlm.nih.gov/medlineplus).
